# Supplementary material for: Assessment of physical vulnerability of buildings and analysis of landslide risk at the municipal scale: application to the Loures municipality, Portugal
Source: Copernicus journal article supplement (doi:10.5194/nhess-16-311-2016), 2016-02-03
Supplement: Supplementary file 1 [file nhess-16-311-2016-supplement.pdf]

Supplement of Nat. Hazards Earth Syst. Sci., 16, 311–331, 2016  
<http://www.nat-hazards-earth-syst-sci.net/16/311/2016/>  
doi:10.5194/nhess-16-311-2016-supplement  
© Author(s) 2016. CC Attribution 3.0 License.

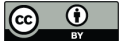

Natural Hazards  
and Earth System  
Sciences  Open Access

*Supplement of*

**Assessment of physical vulnerability of buildings  
and analysis of landslide risk at the municipal scale:  
application to the Loures municipality, Portugal**

**C. Guillard-Gonçalves et al.**

*Correspondence to:* C. Guillard-Gonçalves (cguillard@campus.ul.pt)

The copyright of individual parts of the supplement might differ from the CC-BY 3.0 licence.

## Supplement:

### Supplement 1. Matrix of the experts questionnaire

|      | Landslide body<br>(rotational slide):<br>Depth of the slip surface (m) |   |   |    |    | Landslide foot:<br>Height of affected material (m) |   |   |   |
|------|------------------------------------------------------------------------|---|---|----|----|----------------------------------------------------|---|---|---|
|      | 1                                                                      | 3 | 5 | 10 | 20 | 0.5                                                | 1 | 3 | 5 |
| STB1 |                                                                        |   |   |    |    |                                                    |   |   |   |
| STB2 |                                                                        |   |   |    |    |                                                    |   |   |   |
| STB3 |                                                                        |   |   |    |    |                                                    |   |   |   |
| STB4 |                                                                        |   |   |    |    |                                                    |   |   |   |

Note: complete with a potential damage between 1 (negligible damage) and 5 (very severe damage).

| Structural building type | Structural elements and construction material   |
|--------------------------|-------------------------------------------------|
| SBT1                     | Wood or metal (light structures)                |
| SBT2                     | Adobe, rammed earth or loose stone walls        |
| SBT3                     | Brick or stone masonry walls                    |
| SBT4                     | Masonry walls confined with reinforced concrete |

| Potential damage class | Damage level on buildings (based on Alexander, 1986; AGS, 2000; Tinti et al., 2011; Garcia 2012)                                                                                                                                                                                   |
|------------------------|------------------------------------------------------------------------------------------------------------------------------------------------------------------------------------------------------------------------------------------------------------------------------------|
| 1: Negligible damage   | No significant damage - slight accumulation of material originating aesthetic damages (dirt, chipping paint, etc.)                                                                                                                                                                 |
| 2: Slight damage       | No structural damage - minor repairable damage: chipping of plaster, slight cracks, damage to doors and windows                                                                                                                                                                    |
| 3: Significant damage  | No structural damage - major damage requiring complex repair: displacement or partial collapse of walls or panels without compromising structural integrity, highly developed cracks. Evacuation required                                                                          |
| 4: Severe damage       | Structural damage that can affect the stability of the building: out-of-plane failure or collapse of masonry, partial collapse of floors, severe cracking or collapse of sections of structure due to settlement. Immediate evacuation; demolition of the element may be required. |
| 5: Very severe damage  | Heavy damage seriously compromising the structural integrity: partial or total collapse of the building. Imperative and immediate evacuation and complete demolition.                                                                                                              |
